# Supplementary material for: Impact of NO x on secondary organic aerosol (SOA) formation from α -pinene and β -pinene photo-oxidation: the role of highly oxygenated organic nitrates
Source: Copernicus journal article supplement (doi:10.5194/acp-2019-1168), 2020-01-16
Supplement: Supplementary file 1 [file acp-2019-1168-supplement.pdf]

## Supplement to manuscript:

### Impact of NO<sub>x</sub> on secondary organic aerosol (SOA) formation from $\alpha$ -pinene and $\beta$ -pinene photo-oxidation: the role of highly oxygenated organic nitrates

By: I. Pullinen, S. H. Schmitt, S. Kang, M. Sarrafzadeh, P. Schlag, S. Andres, E. Kleist, T. F. Mentel, F. Rohrer, M. Springer, R. Tillmann, J. Wildt, C. Wu, D. Zhao, A. Wahner and A. Kiendler-Scharr

In the supplement we will derive lower and upper limits for the calibration coefficient of the NO<sub>3</sub><sup>-</sup>-CIMS for HOM (Section S1) and describe how we determined and separated HOM organic nitrates in the high resolution mass spectra (Section S2). In Section S3 we show details of the normalization of HOM concentrations to particle surface and chemical turnover (Experiment 2 in Table 1 of main the manuscript). Gas-phase yields of organic nitrates (ON) for a  $\beta$ -pinene photo-oxidation experiment are described in Section 4 as well as the derivation of OrgNO<sub>3</sub>, the mass of nitrate bound to organic moieties. In Section S5 we will discuss pattern of HOM-ON as function of NO<sub>x</sub> in relation to their mass median HOM. Section S6 provides the peak lists obtained from high resolution spectra from  $\alpha$ -pinene and  $\beta$ -pinene in presence of NO<sub>x</sub>.

We will refer to several reactions and figures given in the main manuscript using the according numbering.

#### S1 Estimation of lower and upper limit of the calibration coefficient for HOM

##### S 1.1 Relative transmission curve of the NO<sub>3</sub><sup>-</sup> – CIMS

The relative transmission curve was determined with perfluoropentanoic acid C<sub>4</sub>F<sub>9</sub>COOH. C<sub>4</sub>F<sub>9</sub>COOH forms several clusters with nitrate ions. In addition it can be deprotonated or fragmented resulting in C<sub>4</sub>F<sub>9</sub><sup>-</sup>. The molecular masses of the observed ions are listed in Table S1 and cover a range of about 700 Th.

Adding C<sub>4</sub>F<sub>9</sub>COOH in varying amounts to the analyte stream (6.4-57 ppb) led to depletion of the reagent ion and reagent ion clusters and to formation analyte (cluster) ions in varying ratios. The total ion signal was not much affected by the presence of C<sub>4</sub>F<sub>9</sub>COOH, it was decreasing by about 10% at the highest load of C<sub>4</sub>F<sub>9</sub>COOH, thus the highest load of higher mass dimers (Figure S1, black). Under the assumption that the total concentration of ions remains constant, we optimized the mass dependent transmission relative to the NO<sub>3</sub><sup>-</sup> signal (m/z = 62 Th) over the range 62 – 791 Th. The resulting transmission function was flat and

monotonously decreasing with increasing molecular weight of the ions, reaching eventually 86% at 791 Th (Figure S1, blue).

**Table S1 Ions for relative transmission**

| Ions                                                                         | m/z [Th] |
|------------------------------------------------------------------------------|----------|
| $\text{HNO}_3 \cdot \text{NO}_3^-$                                           | 124.984  |
| $(\text{HNO}_3)_2 \cdot \text{NO}_3^-$                                       | 186.971  |
| $\text{C}_4\text{F}_9^-$                                                     | 218.986  |
| $\text{C}_4\text{F}_9\text{COO}^-$                                           | 262.975  |
| $\text{C}_4\text{F}_9\text{COOH} \cdot \text{NO}_3^-$                        | 325.971  |
| $\text{C}_4\text{F}_9\text{COOH} \cdot \text{HNO}_3 \cdot \text{NO}_3^-$     | 388.967  |
| $\text{C}_4\text{F}_9\text{COOH} \cdot (\text{HNO}_3)_2 \cdot \text{NO}_3^-$ | 451.962  |
| $\text{C}_4\text{F}_9\text{COOH} \cdot (\text{HNO}_3)_3 \cdot \text{NO}_3^-$ | 514.958  |
| $\text{C}_4\text{F}_9\text{COOH} \cdot \text{C}_4\text{F}_9\text{COO}^-$     | 526.959  |
| $(\text{C}_4\text{F}_9\text{COOH})_2 \cdot \text{NO}_3^-$                    | 589.954  |
| $(\text{C}_4\text{F}_9\text{COOH})_2 \cdot \text{C}_4\text{F}_9\text{COO}^-$ | 790.942  |

This is different to the observations by Heinritzi et al. (2016), but in agreement with the flat transmission function determined by Ehn et al. (2011), for another API-TOF of the same type, without CI source, though.

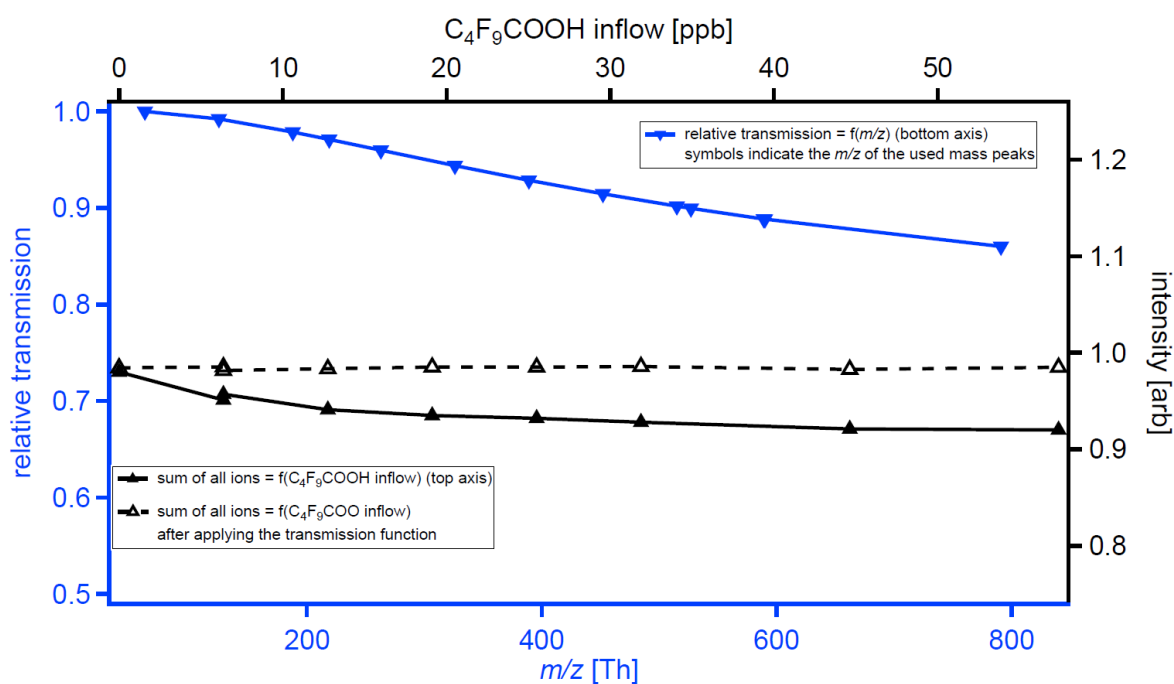

**Figure S1: Relative transmission function for the  $\text{NO}_3^-$ -TOF-CIMS.** The blue parts show the relative transmission as a function of mass to charge ratio ( $m/z$ ). The black parts shows the drop of the sum of all ions with increasing load of  $\text{C}_4\text{F}_9\text{COOH}$ , which changed ratio of reagent ions / analyte ions and the distribution of analyte (clusters) ions with different  $m/z$  (continuous line). The dashed line shows the sum of all ions after applying the transmission correction, which was used for optimization.

## S 1.2 Calibrations of the NO<sub>3</sub><sup>-</sup>-CIMS with H<sub>2</sub>SO<sub>4</sub>.

To calibrate the NO<sub>3</sub><sup>-</sup>-CIMS with sulfuric acid we generated H<sub>2</sub>SO<sub>4</sub> in situ in JPAC by SO<sub>2</sub> oxidation. SO<sub>2</sub> was taken from a gas cylinder (0.94 ppm SO<sub>2</sub> in N<sub>2</sub>) and added at flows of 31.9 and 16.5 mL min<sup>-1</sup> to the chamber air which led to mixing ratios at chamber inlet of 0.97 ppb and of 0.5 ppb, respectively. After the last measurement the addition of SO<sub>2</sub> was stopped at otherwise unchanged conditions and we measured the temporal behaviour of the MS signals, while the SO<sub>2</sub> was flushed out to zero in order to determine background and possible interferences. The ion signals from the NO<sub>3</sub><sup>-</sup>-CIMS were normalized to the sum of all ions in order to minimize effects by the performance of the mass spectrometer. In the following we will term such normalized data as normalized counts (nc).

We added (*E*)-2-butene in a mixing ratio of 18.2 ppb as tracer for OH at chamber inlet. (*E*)-2-butene was chosen because it did not produce detectable amounts of particles upon photo-oxidation. OH production was induced by ozone photolysis in presence of water vapour as usual. The OH concentrations in steady state were determined to  $(3.3 \pm 0.8) \times 10^7 \text{ cm}^{-3}$  from the observed (*E*)-2-butene consumption by applying  $k_{\text{OH}+(\text{E})\text{-2-butene}} = 6.4 \times 10^{-11} \text{ cm}^3 \text{ s}^{-1}$ ,  $k_{\text{O}_3+(\text{E})\text{-2-butene}} = 1.0 \times 10^{-16} \text{ cm}^3 \text{ s}^{-1}$  (Atkinson, 1997), and the observed [O<sub>3</sub>]<sub>ss</sub>. The [OH] remained about the same when SO<sub>2</sub> concentrations were changed. This is related to the low reactivity of SO<sub>2</sub> compared to that of (*E*)-2-butene.

In the resulting mass spectra we observed several peaks with intensities significantly above the detection limit. Dominant peaks were those of the reagent ion NO<sub>3</sub><sup>-</sup> and its oligomers which covered more than 95 % of the signal intensities. Strong peaks arising from H<sub>2</sub>SO<sub>4</sub> were found at  $m/z = 97$  Th (H<sup>32</sup>SO<sub>4</sub><sup>-</sup> ion),  $m/z = 160$  Th (H<sup>32</sup>SO<sub>4</sub>·HNO<sub>3</sub><sup>-</sup>) and  $m/z = 223$  Th (H<sup>32</sup>SO<sub>4</sub>·(HNO<sub>3</sub>)<sub>2</sub><sup>-</sup>). To obtain the H<sub>2</sub>SO<sub>4</sub> concentration we summed up the signal intensities of the three peaks and multiplied the sum by 1.04 in order to consider the <sup>34</sup>S isotopes. From the measurements after the SO<sub>2</sub> inflow was stopped we ensured that the selected peaks were related only to H<sub>2</sub>SO<sub>4</sub> and not interfered by (*E*)-2-butene oxidation products.

The reaction of OH with SO<sub>2</sub> is the rate limiting step of the H<sub>2</sub>SO<sub>4</sub> production as the reaction of HSO<sub>3</sub> with H<sub>2</sub>O is much faster at the mixing ratio of water vapour of 1.06 % than the oxidation of SO<sub>2</sub> by OH:

$$P(\text{H}_2\text{SO}_4) = k_{\text{SO}_2} \cdot [\text{SO}_2] \cdot [\text{OH}] \quad (\text{S1})$$

In Eq. S1,  $k_{SO_2}$  is the rate constant ( $1.1 \times 10^{-12} \text{ cm}^3 \text{ s}^{-1}$ , Atkinson et al., 2004) and  $[SO_2]$  is the  $SO_2$  concentration in our chamber. As OH reacts with  $SO_2$  the  $[SO_2]$  is depleted in the chamber according to Eq. S2:

$$\frac{d[SO_2]}{dt} = \frac{F}{V} \cdot ([SO_2]_0 - [SO_2]) - k_{SO_2} \cdot [SO_2] \cdot [OH] \quad (S2)$$

In Eq. S2,  $V$  is the volume of the chamber,  $F$  the air flow through the chamber,  $[SO_2]_0$  represents the  $SO_2$  concentration at chamber inlet and  $[SO_2]$  represents the  $SO_2$  concentration in the chamber.

Setting the differential equation (S2) to steady state and solving for  $[SO_2]_0 / [SO_2]$  leads to:

$$\frac{[SO_2]_0}{[SO_2]} = \frac{V}{F} \cdot k_{SO_2} \cdot [OH] + 1 \quad (S3)$$

The concentration of  $SO_2$  in the chamber was calculated from  $[SO_2]_0$  and  $[OH]$  and we obtained mixing ratios of 0.87 and 0.45 ppb, respectively. Using these mixing ratios, the production rates of  $H_2SO_4$  were determined to  $P(H_2SO_4) = 8.03 \times 10^5 \text{ cm}^{-3} \text{ s}^{-1}$  and  $4.15 \times 10^5 \text{ cm}^{-3} \text{ s}^{-1}$  in the two experiments.

Particle formation was not observed and the only important loss of  $H_2SO_4$  was its deposition at the surfaces of the chamber. Wall losses of  $H_2SO_4$  had been determined in a similar experiment, but OH production was switched off and  $H_2SO_4$  production was stopped. We observed an exponential decay of  $H_2SO_4$  with a lifetime  $87 \pm 5 \text{ s}$  (loss rate  $L_W = 1/\tau = 0.012 \pm 0.001 \text{ s}^{-1}$ ).

Knowing the production rate of  $H_2SO_4$  and its first order loss rate allowed for calculating its concentrations in the chamber:

$$[H_2SO_4] = \frac{P(H_2SO_4)}{L(H_2SO_4)} \quad (S4)$$

Figure S2 shows the signal intensities of the sulfuric acid related peaks as a function of  $[H_2SO_4]$  which was determined according to Eq. S4.

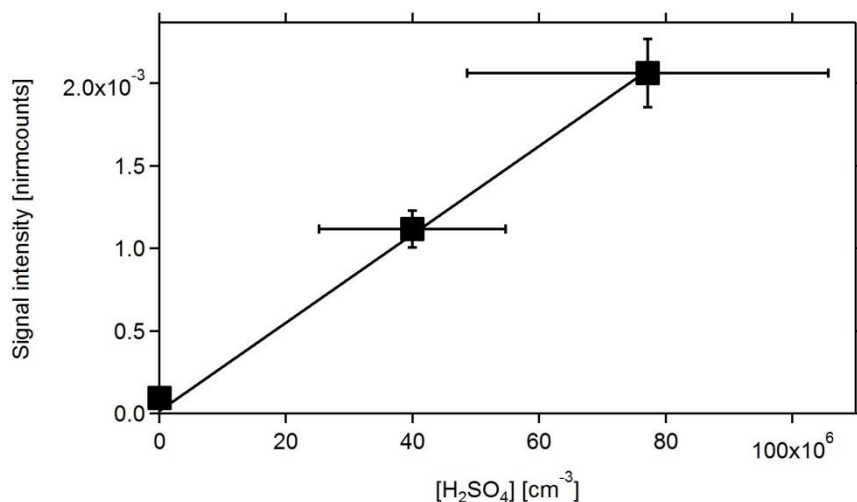

**Figure S2: Plot of normalized and summed signal intensities versus [H<sub>2</sub>SO<sub>4</sub>] concentration. The solid line shows the linear regression forced through zero. The inverse of the slope was used to determine calibration factor C<sub>H<sub>2</sub>SO<sub>4</sub></sub>. The main uncertainty in the determination is due to the uncertainty of [H<sub>2</sub>SO<sub>4</sub>] that was estimated to ± 37 %.**

The signal intensity at  $m/z$  97, 160, and 223 Th measured after the flush out of SO<sub>2</sub> from the chamber was similar to that observed in many other experiments. It was therefore assumed to represent the background level of H<sub>2</sub>SO<sub>4</sub> in our chamber when the UV light is on ( $\sim 2 \times 10^6$  cm<sup>-3</sup>). Since this signal is real, we forced the regression through zero. The inverse of the slope of the regression line gave us the calibration coefficient C<sub>H<sub>2</sub>SO<sub>4</sub></sub> in units of molecules cm<sup>-3</sup> nc<sup>-1</sup>. C<sub>H<sub>2</sub>SO<sub>4</sub></sub> was determined to  $(3.7 \pm 1.2) \times 10^{10}$  molecules cm<sup>-3</sup> nc<sup>-1</sup>. The relative uncertainty of C<sub>H<sub>2</sub>SO<sub>4</sub></sub> was estimated to ± 37 % from the uncertainty of [OH] (~ 20 %), the uncertainty of the SO<sub>2</sub> concentration (~5 %), and the uncertainty of L<sub>W</sub> (~ 25%) using error propagation.

C<sub>H<sub>2</sub>SO<sub>4</sub></sub> as determined here is about an order of magnitude higher than that determined by Ehn et al., (2014) who found 4 - 5 × 10<sup>9</sup> molecules cm<sup>-3</sup> nc<sup>-1</sup>. This discrepancy might be due to a lower performance of the NO<sub>3</sub><sup>-</sup>-TOF-CIMS during our measurements, and we used C<sub>H<sub>2</sub>SO<sub>4</sub></sub> = 3.7 × 10<sup>10</sup> molecules cm<sup>-3</sup> nc<sup>-1</sup> for further calculations. As described by Ehn et al. (2014) and Hyttinen et al. (2017), HOM with 6 and more O-atoms are detected with similar sensitivity as H<sub>2</sub>SO<sub>4</sub>. We therefore also used C<sub>H<sub>2</sub>SO<sub>4</sub></sub> to calculate HOM concentrations by setting C<sub>HOM</sub> = C<sub>H<sub>2</sub>SO<sub>4</sub></sub>.

### S1.3 Comparison of HOM condensation and SOA formation

The high sensitivity of the  $\text{NO}_3^-$ -CIMS to sulfuric acid is due to the effective deprotonation of  $\text{H}_2\text{SO}_4$  and formation of clusters with the nitrate reagent ions, that is essentially collision limited. The cluster formation of HOM nitrate clusters is supposedly also collision limited (Ehn et al., 2014; Kirkby et al., 2016; Hyttinen et al., 2017). Setting  $C_{\text{HOM}} = C_{\text{H}_2\text{SO}_4}$  allows for calculation of concentrations or mixing ratio of HOM, at least their lower limit, since the sensitivity for the detection of HOM can only be lower than the collision limit. An upper limit for  $C_{\text{HOM}}$  can be derived by applying the effective uptake coefficients of HOM derived in the main manuscript, which give the maximum potential of HOM to form particulate matter. In the main manuscript, we showed that HOM with more than 6 O-atoms efficiently contribute to particle formation with uptake coefficients close to one. The mass of those HOM expected to condense, can be calculated by summing up the mass weighted gas-phase concentrations in absence of particles. Since other compounds can also contribute to SOA, an upper limit for  $C_{\text{HOM}}$  can be determined from the measured increase of particle mass.

We applied  $C_{\text{HOM}} = C_{\text{H}_2\text{SO}_4}$ , determined HOM concentrations and summed up the concentrations of all HOM with masses between 230 and 550 Da as they all are expected to contribute to particle formation.

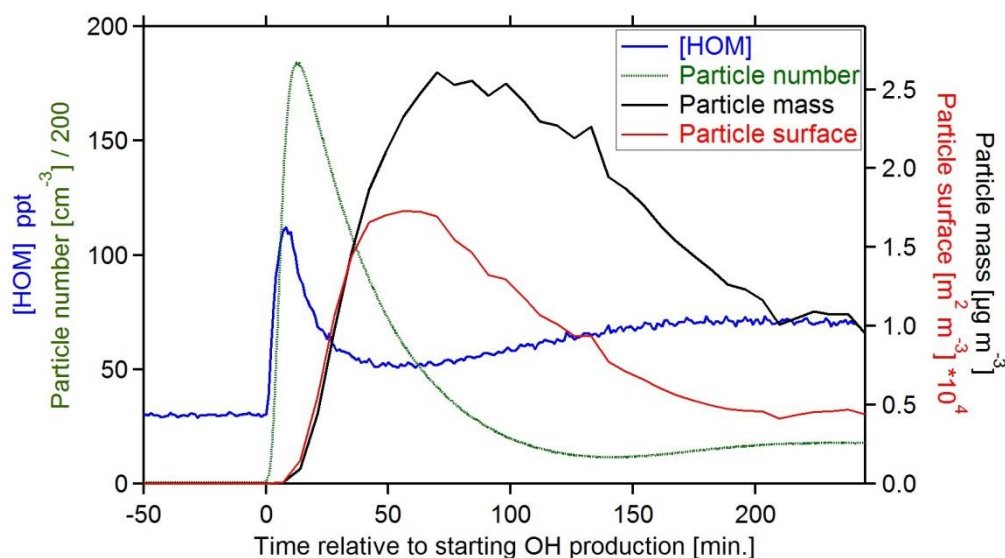

Figure S3: Temporal evolution of the mixing ratios of the HOM sum (molecular weights between 230 and 550 Da, blue line), particle number (green dashed line, divided by 200), particle surface (red line, multiplied by  $10^4$ ), and particle mass (black line). Data from  $\alpha$ -pinene experiment with  $[\alpha\text{-pinene}]_{\text{SS}} = 1.4$  ppb and  $[\text{NO}_x]_{\text{SS}} = 0.3$  ppb. HOM from ozonolysis  $\alpha$ -pinene were observable before OH production was induced at  $t = 0$  min.

A typical experiment with  $\alpha$ -pinene was performed as follows. About 10 ppb  $\alpha$ -pinene were added to the chamber while  $[\text{OH}]$  was about  $4 \times 10^7 \text{ cm}^{-3}$ . Without addition of  $\text{NO}_x$ , we found HOM mixing ratios of up to 120 ppt, short after the OH production was started (Figure S3). When new particle formation (NPF) set on, the HOM mixing ratio decreased with increasing particle formation. The HOM mixing ratio went through a minimum that appeared aligned to the maximum particle surface and increased again as soon as particle surface decreased. After 200 min. we approached steady state for particle number, particle surface, particle mass, and gas-phase HOM.

We can explain the relation of HOM mixing ratio, particle surface, and particle mass observed in Figure S3. After starting the OH production it took several minutes to reach maximum HOM mixing ratios. The amount of HOM condensing on the particles increased with increasing particle surface until the particle surface decreased again. Decrease of particle surface is due to coagulation and flush-out of particles. This reduced HOM condensation on the particle and caused decreasing particle mass. About 3 hours after starting the OH production, a situation close to steady state is reached with only small fluctuations, where particle production, HOM production and condensation, as well as flush-out balance.

We calculated the mass transferred by HOM condensation from the gas phase to the particle phase by applying the mass balance equation Eq. S5:

$$\frac{dP_M}{dt} = -\frac{F}{V} \cdot [P_M] + [\text{HOM}]_{LP} \cdot L_P \quad (\text{S5})$$

Herein,  $[P_M]$  is the particle mass concentration in the reaction chamber and  $[\text{HOM}]_{LP}$  represents the fraction of HOM that condense on particles and not are lost on the chamber walls.  $L_P$  is the loss coefficient for condensation of HOM on particles. At steady state conditions and in consideration of  $\frac{F}{V} = \frac{1}{\tau}$  with  $\tau$  = residence time of the air in the chamber, it follows:

$$[P_M] = [\text{HOM}]_{LP} \cdot L_P \cdot \tau \quad (\text{S6})$$

$L_P$  was determined and its dependence on particle surface is in accordance with kinetic gas theory (see main text, Section 2.4, Eq. 7). To determine  $[\text{HOM}]_{LP}$  we used the methods described in Sarrafzadeh et al. (2016). Therein the fraction of HOM condensing on particles and not lost on the chamber walls is given by:

$$F_P(HOM) = \frac{L_P(HOM)}{L_P(HOM) + L_W(HOM)} \quad (S7)$$

Thus, Eq. S6 can be reformulated using Eq. S7 to:

$$[P_M] = [HOM] \cdot \frac{L_P^2(HOM)}{L_P(HOM) + L_W(HOM)} \cdot \tau \quad (S8)$$

Eq. S8 is only valid for steady state conditions where  $[HOM]$  is constant. As can be seen from Figure S3,  $[HOM]$  still varied somewhat due to the variable particle surface even under overall near steady state conditions. We therefore replaced the  $[HOM] \times \tau$  by the running value  $\Sigma_{t-\tau}^t [HOM]$ , i.e. the sum of HOM mixing ratios measured over one residence period  $\tau$  of about 46 min. before the respective measurement of the particle mass. This way the  $[P_M]$  originating from HOM condensation was predicted (under application of  $C_{HOM} = C_{H_2SO_4}$ ). Figure S4 compares exemplarily the observed particle mass concentration with the predicted mass from HOM condensation beginning with the onset of achieving steady state conditions.

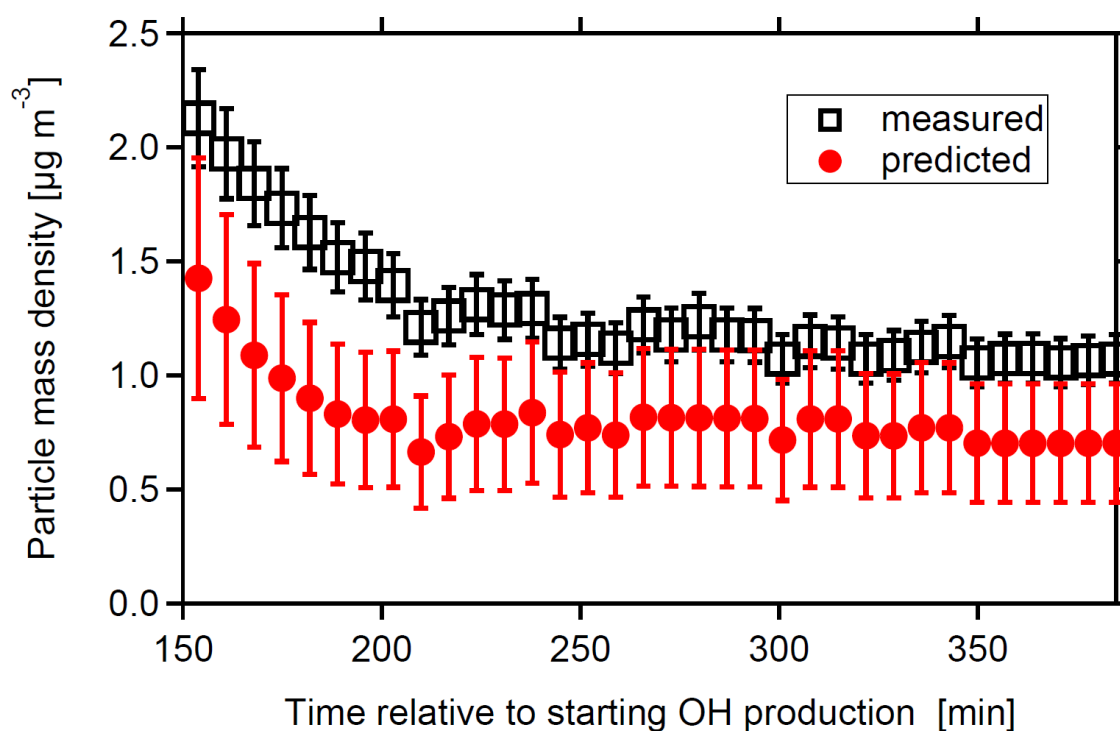

Figure S4: Particle mass from SMPS measurements (black squares, error  $\pm 10\%$ ) and particle mass predicted by HOM condensation (red circles, error  $\pm 37\%$ ). The particle mass derived from SMPS was calculated from the measured particle number concentration with a density of  $1.2 \text{ g/cm}^3$ . Experiment with  $\alpha$ -pinene ( $[\alpha\text{-pinene}]_0 \sim 11 \text{ ppb}$ ,  $[\alpha\text{-pinene}]_{ss} \sim 1.4 \text{ ppb}$ ,  $[\text{NO}_x]_{ss} \sim 0.3 \text{ ppb}$ ).



At steady state conditions for  $t > 250$  min, particle mass predicted from HOM condensation parallels the observed particle mass (Figure S4). Figure S4 indicates that indeed a large fraction of the measured particle mass was produced by the mass of condensing HOM. Six more experiments of the same type as shown in Figure S3 showed that on average ( $57 \pm 13$ )% of the particle mass can be explained by condensation of HOM. As HOM condensation cannot form more particle mass than measured and assuming all SOA stemmed from HOM led to an upper limit for  $C_{\text{HOM}} \sim 6.5 \times 10^{10}$  molecules  $\text{cm}^{-3} \text{nc}^{-1}$ . As the upper and lower limit of  $C_{\text{HOM}}$  differed by less than a factor of 2, we concluded that we can constrain HOM concentrations within a factor of 2. Note, for HOM concentrations given in the main text, we used  $3.7 \times 10^{10}$  molecules  $\text{cm}^{-3} \text{nc}^{-1}$  as calibration factor and HOM concentrations might have been maximum a factor of 2 higher.

At the conditions in our chamber where monoterpene mixing ratios were typically below 10 ppb, on average *at least* 57 % of the particle mass was produced by condensation of HOM. From this we can confirm that SOA play a crucial role in particle mass formation.

From these findings we furthermore concluded, that the difference we found between the fraction of organic bound nitrate ( $\text{OrgNO}_3$ ) in particles (main text Figure 7) and in the HOM contributing to particle mass (main text Figure 8) cannot be explained by a higher sensitivity of the  $\text{NO}_3^-$ -CIMS for HOM-ON than for other HOM-termination products. The upper limit of  $C_{\text{HOM}}$  indicates that at least every second collision of a non-organic nitrate HOM with  $\text{NO}_3^-$  leads to its detection as a cluster. Hence the maximum sensitivity for a HOM-ON can be at maximum two times higher than that for other termination products. However, with a factor of 3 to 4 the difference between  $\text{OrgNO}_3$  found in HOM and in particles was nearly twice as high. An explanation of this large difference solely by different sensitivities seems unrealistic.

## **S2. Identification of organic nitrates in high resolution mass spectra**

High resolution data were analysed using Tofware (v.2.5.11, Tofwerk AG and Aerodyne Research, Inc.) and Igor Pro (7.08) (Wavemetrics). Data was averaged over 1 minute with a built in pre-averaging unit function. Instrument functions (peak shape, peak width and baseline) were acquired from the built in function that uses the algorithm described in Stark et al. (2015). The mass calibration, instrumental line shape and peak width were determined by following standard procedures. Mass calibration accuracy was better than 5 ppm. The mass resolution ( $m/\Delta m$ ) for the  $m/z$  range 300-400 was about 5000.

The following procedure was used for peak identification. We fitted the observed shape of the peak under investigation applying instrument peak shape and peak width function determined above. When needed, we increased the number of fitted peaks until the residuals showed no big bias towards missing components. Once we determined how many peaks were under the measured peak, molecular formulas consisting of C, H, O, and N-atoms were assigned to the fitted peaks. Therein less than 15 ppm of error was allowed between the fit maximum and the exact formula mass.

In addition to the mass defect criterion, the following constraints were considered for peak identification. Only inherent meaningful molecular formulas were assigned and  $^{13}\text{C}$  isotopy must be commensurate to the assignment. The time behaviour of the expected molecule according to the formula must be commensurate with expectation for the photochemical system chemical system, e.g. significant amounts of ON can only be formed in presence of sufficient  $\text{NO}_x$ . As an example for the identification of a HOM-ON, Figure S5 shows the peaks at  $m/z = 263$  Da under different  $\text{NO}_x$  conditions, respectively. (Note, we expect HOM-ON with the functional group  $-\text{O}-\text{NO}_2$  and with the functional group  $-\text{OO}-\text{NO}_2$ , i.e. PAN like compounds. They arise from HOM peroxy radicals or HOM acyl peroxy radicals with NO and  $\text{NO}_2$ , respectively, and cannot be distinguished in our reaction systems by MS alone.)

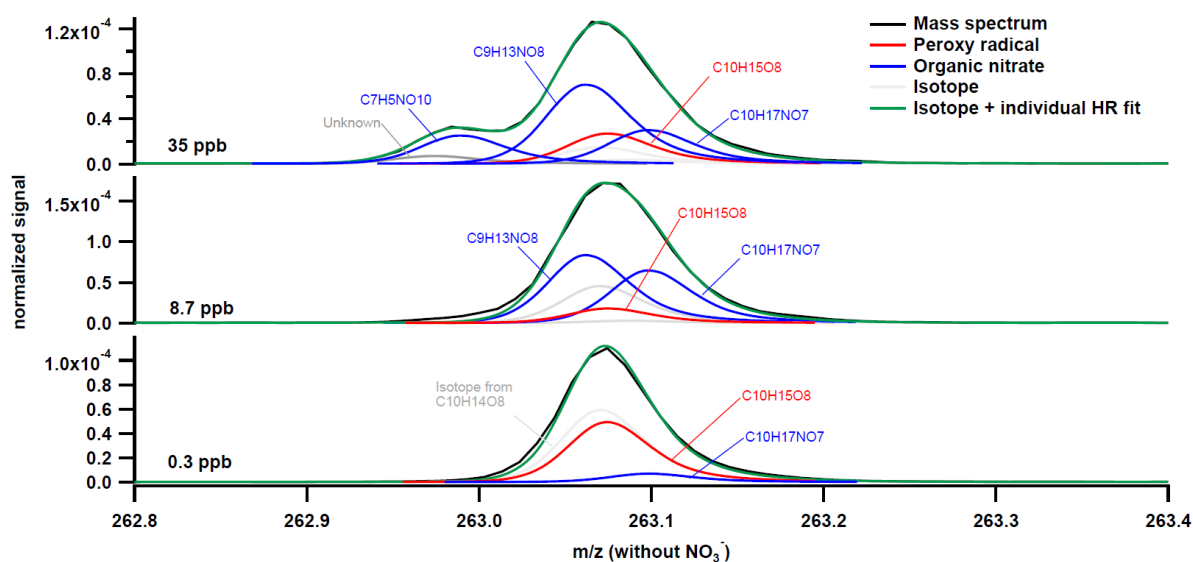

**Figure S5:** Separation of  $\text{RO}_2$  (red) and organic nitrates (blue) in high resolution spectra at the integer mass of 263 Da. Steady state  $[\text{NO}_x]$  increase from 0.3 ppb in the lower to 35 ppb in the top panel. Mass spectra were normalized to the sum of all ion signals. With increasing  $[\text{NO}_x]$  the compound  $\text{C}_7\text{H}_5\text{NO}_{10}$  appears which is probably formed heterogeneously at the chamber walls

### S3. Normalization of HOM concentration to actual particle surface and actual [OH]

Essentially, we want to consider relative changes of HOM concentrations. We assumed overall the same sensitivity for all HOM with  $O > 6$  in accordance with Riva et al. (2019) for nitrate CIMS. Under these conditions the normalization procedures described in the following are independent of an exact calibration. Adding to or removing  $\text{NO}_x$  from a photochemical system directly impacts OH concentrations by reactions R1 and R2.  $\text{NO}_x$  furthermore suppresses new particle formation (NPF, Wildt et al., 2014) which leads to reduction of the actual particle surface and thus the condensation sink for HOM with increasing  $[\text{NO}_x]$ . The actual OH concentration affects the turnover of the precursor, thus the production of  $\text{RO}_2\cdot$  and HOM. In addition, loss of condensational sink impacts on condensational loss of HOM. Both factors change the observed HOM gas-phase mixing ratio and can superimpose the impacts of  $\text{NO}_x$  on the peroxy radical chemistry itself. In order to separate the chemical impacts of  $\text{NO}_x$  on HOM-peroxy radical chemistry we took out the effects of [OH] and the condensational sink as much as possible. This was achieved by normalizing the HOM mixing ratio to particle free conditions and to a certain reference turnover of the precursor molecule. To derive the HOM mixing ratio for a particle free chamber in cases where NPF could not be suppressed despite optimized boundary conditions, we applied a similar approach as to determine the effective uptake coefficients of HOM (Section 3.5) and the wall loss of HOM (Sarrafzadeh et al., 2016).

Both were based on the ratio of signal intensities ( $S$ ) or here concentrations ( $c$ ) of HOM in presence and absence of aerosols (Equation 1):

$$\frac{S(HOM)^0}{S(HOM)} = \frac{c(HOM)^0}{c(HOM)} = \frac{L_W(HOM) + L_P(HOM)}{L_W(HOM)} \quad (S9)$$

In Equation S9,  $S(HOM)^0$  and  $c(HOM)^0$  are the signal intensities and mixing ratio as determined for an individual HOM at negligibly low particle surface ( $< 10^{-5} \text{ m}^2 \text{ m}^{-3}$ ).  $S(HOM)$  and  $c(HOM)$  are the signal intensities and the respective mixing ratio measured in the presence of significant particle surface under otherwise the same experimental conditions.  $L_W(HOM)$  represents wall loss rates that were measured from the decay of signal intensities after switching off HOM production. Since we know  $L_W(HOM)$ ,  $L_P(HOM)$  can be calculated by solving Equation S9  $L_P(HOM)$ . Once knowing  $L_W(HOM)$  and  $L_P(HOM)$  as a function of particle surface allows extrapolating  $c(HOM)^0$  from  $c(HOM)$  measured during in any other experiment by using the ratio  $c(HOM)^0/c(HOM)$  as correction factor. The values for

$c(HOM)^0/c(HOM)$  were determined using the third term of equation S9 which is just the ratio of the total loss rate over the loss rate on particles.

The dependence of HOM concentrations on the turnover  $k_{OH} \times [OH] \times [MT]$  was determined in experiments by varying  $[OH]$ . The  $k_{OH}$  are the rate coefficients for the reaction of the respective MT with the OH radical ( $k_{OH} = 5.37 \times 10^{-11} \text{ cm}^3 \text{ s}^{-1}$  ( $\alpha$ -pinene) and  $7.89 \times 10^{-11} \text{ cm}^3 \text{ s}^{-1}$  ( $\beta$ -pinene), Atkinson, 1997). We varied  $[OH]$  by changing  $J(O^1D)$  at constant inflow of  $\alpha$ -pinene or  $\beta$ -pinene. A non-linear dependence was found between  $c(HOM)$  and  $k_{OH} \times [OH] \times [\alpha/\beta\text{-pinene}]$ . One reason for this non-linearity is HOM formation from ozonolysis reaction. We focus here on the method used to normalize the measured  $c(HOM)$  to a certain oxidation rate that was used as reference.

In double logarithmic plots of  $\ln(c(HOM))$  versus  $\ln(k_{OH} \times [OH] \times [\alpha/\beta\text{-pinene}])$ , we obtained linear relationships at high OH concentrations ( $> 10^7 \text{ cm}^{-3}$ ) when MT ozonolysis played only a minor role ( $< 10\%$ ). For  $\alpha$ -pinene we observed a strong contribution to HOM formation that was attributed to ozonolysis as shown in Figure S6 while for  $\beta$ -pinene the ozonolysis contribution was smaller.

The following analysis will be restricted to data where the turnover by OH was  $> 4.0 \times 10^7 \text{ cm}^{-3} \text{ s}^{-1}$  and at least an order of magnitude higher than the oxidation rate by ozonolysis. This was the case for all our measurements with  $\text{NO}_x$ . Therefore we used the linear part of the curve shown in Figure S6 for normalization of  $\alpha$ -pinene data.

Normalization was performed using Equation S10. To normalize the HOM signal intensities to turnover, we applied the slope (slp) of  $1.47 \pm 0.07$  of the power law plot (Figure S6):

$$c_R(HOM) = \frac{Tnv_R^{slp}}{Tnv_M^{slp}} \cdot c_M(HOM) \quad (S10)$$

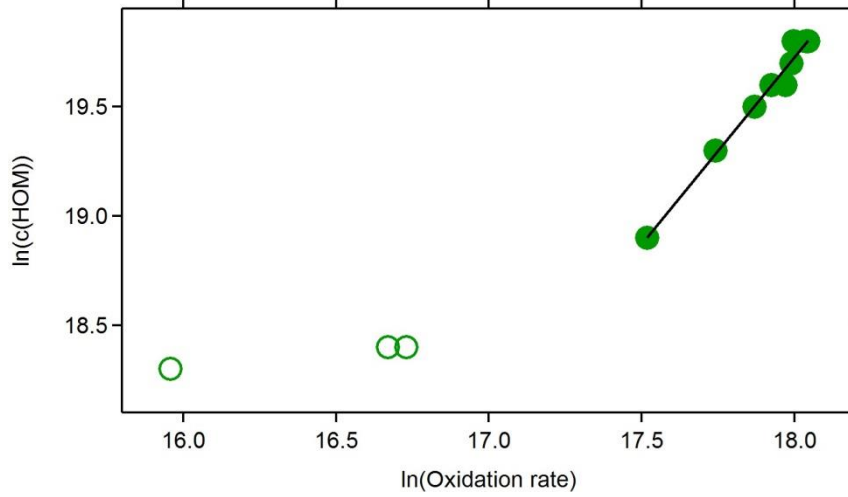

**Figure S6: Plot of  $\ln(c(HOM))$  versus  $\ln(k_{OH} \times [OH] \times [\alpha\text{-pinene}])$ .** Data were obtained from an experiment where  $[OH]$  was varied between  $8.9 \times 10^5 \text{ cm}^{-3}$  and  $4.8 \times 10^7 \text{ cm}^{-3}$  by varying  $J(O^1D)$ . At OH oxidation rate  $< 4.1 \times 10^7 \text{ cm}^{-3} \text{ s}^{-1}$  which occurred at  $[OH]_{SS} \sim 7.6 \times 10^6 \text{ cm}^{-3}$  and  $[\alpha\text{-pinene}]_{SS} \sim 4.0 \text{ ppb}$  HOM formation from ozonolysis interfered substantially with HOM formation from OH reactions and deviation from linearity appeared. ( $[O_3]_{SS}$  varied from 14.6 to 25 ppb, caused by the variation of  $J(O^1D)$ ). Neglecting the data points at OH oxidation rate below  $4.1 \times 10^7 \text{ cm}^{-3} \text{ s}^{-1}$  (open circles), linear power law behavior was observed with a slope,  $slp = 1.47 \pm 0.07$ .

In Equation S10,  $c_R(HOM)$  is the HOM concentration normalized to the turnover at the reference case with  $Tn_{VR} \cdot c_M(HOM)$  is the HOM mixing ratio measured during an experiment where the turnover is  $Tn_{VR}$ . As correction factor we used the ratio  $Tn_{VR}^{slp} / Tn_{VM}^{slp}$ . As the reference turnover, we used the largest turnover of  $9.06 \times 10^7 \text{ cm}^{-3} \text{ s}^{-1}$  at low  $NO_X$  conditions ( $[NO_X] \sim 0.3 \text{ ppb}$ ). The variation of  $Tn_{VR}^{slp} / Tn_{VM}^{slp}$  was less than 30% for the  $\alpha$ -pinene systems. For the  $\beta$ -pinene systems we applied the same approach. The reference turnover  $Tn_{VR}$  was set to  $2.19 \times 10^8 \text{ cm}^{-3} \text{ s}^{-1}$  and the resulting  $slp = 3.8 \pm 0.5$ . The correction using the ratio  $Tn_{VR}^{slp} / Tn_{VM}^{slp}$  was less than 20% for the  $\beta$ -pinene systems.

Whenever it was necessary to normalize HOM mixing ratio to both, particle free conditions and to a certain turnover, we used the product of both correction factors. The HOM mixing ratio normalized to both, turnover and negligible particle surface,  $c(HOM)$  was calculated according to Equation S11 where  $c_M(HOM)$  is the measured mixing ratio.

$$c(HOM) = c_M(HOM) \cdot \frac{L_W(HOM) + L_P(HOM)}{L_P(HOM)} \cdot \frac{Tn_{VR}^{slp}}{Tn_{VM}^{slp}} \quad (S11)$$

#### S4: Determination of HOM-ON and OrgNO<sub>3</sub> produced from β-pinene oxidation

The experiment described in Section 3.2 of the manuscript was performed by adding 39 ppb β-pinene ( $[\beta\text{-pinene}]_0$ ), 50 ppb NO<sub>x</sub> ( $[\text{NO}_x]_0$ ) and 3.7 ppb m-xylene ( $[\text{m-xylene}]_0$ ) to the chamber. In presence of OH these mixing ratios decreased to 6.5 ppb β-pinene, 20 ppb NO<sub>x</sub> and 0.6 ppb m-xylene during steady state conditions. When the β-pinene inflow was removed from the chamber and the OH concentrations were adjusted to same values as before the removal,  $[\text{NO}_x]$  was about 32 ppb.

At first we consider the system in absence of β-pinene (Figure 1,  $t \sim 3$  h). In absence of β-pinene the loss of NO<sub>x</sub> was determined by reactions of NO<sub>2</sub> with OH (R1), by reactions of NO<sub>x</sub> with the peroxy radicals produced by photo-oxidation of m-xylene and by reactions of NO<sub>2</sub> with O<sub>3</sub>.

Compared to the first two reactions, the reaction of NO<sub>2</sub> with O<sub>3</sub> is of minor importance for the NO<sub>x</sub> balance. The oxidation rate of NO<sub>2</sub> by O<sub>3</sub> is about 4 times smaller than that by OH (R1) ( $k_{\text{O}_3+\text{NO}_2} = 2.6 \times 10^{-17} \text{ cm}^3 \text{ s}^{-1}$ , IUPAC (2008);  $[\text{O}_3] = 1.4 \times 10^{-12} \sim 60 \text{ ppb}$ , oxidation rate  $2.7 \times 10^{-7} \text{ cm}^3 \text{ s}^{-1}$ ). Moreover, the NO<sub>3</sub> radicals formed in this reaction mostly either were photolyzed or reacted with NO, thus recycled to NO<sub>x</sub>. We therefore neglected the reaction NO<sub>2</sub> with O<sub>3</sub>.

Organic nitrates can be formed in reaction R5 and R6:

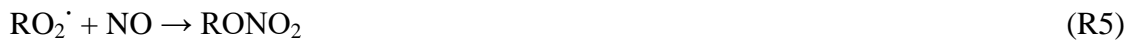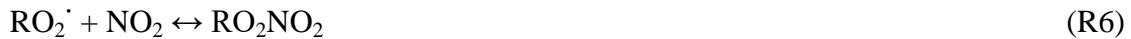

To keep the following rate equations simple we merged reactions R5 and R6 and describe the loss rates of NO<sub>x</sub> due to both these reactions by  $L(\text{RO}_2^c)$  where the index  $c$  stands for the respective compound ( $\text{mx} = \text{m-xylene}$  and  $\text{b} = \beta\text{-pinene}$ ). The rate equation for NO<sub>x</sub> in absence of β-pinene reads:

$$\frac{d[\text{NO}_x]}{dt} = \frac{F}{V} \cdot ([\text{NO}_x]_{in} - [\text{NO}_x]) - k_{\text{NO}_2+\text{OH}} \cdot [\text{OH}] \cdot [\text{NO}_2] - L(\text{RO}_2^{\text{mx}}) \quad (\text{S12})$$

In Eq. S12,  $V$  is the volume of the chamber,  $F$  is the total air flow through the chamber,  $[NO_X]$  is the concentration of  $NO_X$  in the chamber (measured at the chamber outlet) and  $[NO_X]_{in}$  is the  $NO_X$  concentration at chamber inlet. The first term on the right side of equation S12 describes in- and outflow of  $NO_X$ , the second term describes the loss rate according to reaction R1 and the third term describes the loss rates of  $NO_X$  in reactions with peroxy radicals formed from *m*-xylene.

For steady state conditions we obtain:

$$\frac{F}{V} \cdot ([NO_X]_{in} - [NO_X]) = k_{NO_2+OH} \cdot [OH] \cdot [NO_2] + L(RO_2^{mx}) \quad (S13)$$

Data for the term on the left side of equation S13 were measured. For the rate coefficient of reaction R1 several values can be found in the literature. For example, applying a small rate coefficient ( $k_{OH+NO_2} = 6.8 \times 10^{-11} \text{ cm}^3 \text{ s}^{-1}$ , Burrows et al. (1983),  $NO_2$  is oxidized at a rate of  $1.04 \times 10^8 \text{ cm}^{-3} \text{ s}^{-1}$ . Applying a high rate constant ( $k_{OH+NO_2} = 8.5 \times 10^{-11} \text{ cm}^3 \text{ s}^{-1}$ , Donahue et al. (1997), both rate coefficients for the 3<sup>rd</sup> order reaction include  $M = 2.5 \times 10^{19} \text{ cm}^{-3}$ ) results in an oxidation rate of  $1.3 \times 10^8 \text{ cm}^{-3} \text{ s}^{-1}$ . Accordingly, reaction R1 could have caused a decrease of  $[NO_X]$  between 12 and 15 ppb within the residence time of the air in the chamber.

During this phase of the experiment we measured a loss of  $NO_X$  of 18 ppb (see Figure 1 in the main text) and we attribute the remaining loss of 3 – 6 ppb to reactions of  $NO_X$  with peroxy radicals formed during photooxidation of *m*-xylene. Due to the uncertainty in the rate constants given for reaction R1, nothing can be concluded with respect to the yield of organic nitrate formation for *m*-xylene. However, we used the measured difference of 18 ppb for  $[NO_X]_{in} - [NO_X]$  as reference to calculate the yield of organic nitrate formation from  $\beta$ -pinene.

Because  $[OH]$  was re-adjusted after the removal of  $\beta$ -pinene, the respective *m*-xylene concentrations as well as its turnover was same as in the presence of  $\beta$ -pinene. Using the  $NO_X$  losses measured in the  $\beta$ -pinene free system therefore accounts for ON formation by *m*-xylene peroxy radicals. With  $\beta$ -pinene in the system the rate equation for  $NO_X$  reads:

$$\frac{d[NO_X]}{dt} = \frac{F}{V} \cdot ([NO_X]_{in} - [NO_X]) - k_{NO_2+OH} \cdot [OH] \cdot [NO_2] - L(RO_2^{mx}) - L(RO_2^b) \quad (S14)$$

$L(RO_2^b)$  describes the loss rate of  $NO_X$  due to the formation of organic nitrates with peroxy radicals originating from  $\beta$ -pinene. For steady state it follows:

$$\frac{F}{V} \cdot ([NO_X]_{in} - [NO_X]) = k_{NO_2+OH} \cdot [OH] \cdot [NO_2] + L(RO_2^{mx}) + L(RO_2^b) \quad (S15)$$

Organic nitrate formation from  $\beta$ -pinene was calculated from the difference  $[NO_X]_{in} - [NO_X]$  at steady state conditions in presence and in absence of  $\beta$ -pinene, respectively. In presence of  $\beta$ -pinene the consumption of  $NO_X$  was higher by 12 ppb (Figure 1 of the main text).

For the experiment described in the main text we obtained a formation rate of:  $1.07 \times 10^8 \text{ cm}^{-3} \text{ s}^{-1}$ , i.e. about 12 ppb organic nitrates were formed within the residence time of the air in the chamber. Presuming that one  $NO_X$  molecule forms one organic nitrate molecule, the loss of 12 ppb  $NO_X$  is equivalent to the formation of 12 ppb of nitrate bound to organic moieties. With the nitrate molecular mass of 62 Da the total amount of nitrate bound to organic moieties ( $OrgNO_3$ ) was around  $33 \mu\text{g m}^{-3}$ .

By setting the formation of 12 ppb organic nitrates in relation to the consumption of 33 ppb  $\beta$ -pinene, we estimate the molecular yield of organic nitrate formation at the conditions of our experiment to about 36 %. For the steady state conditions with 20 ppb  $\beta$ -pinene we estimated the  $HNO_3$  production. We used the average of the two rate constants given above for reaction R1 ( $k_{OH+NO_X} = 1.2E-11 \text{ cm}^3 \text{ s}^{-1}$ ) and obtained  $k_{OH+NO_X} \times [OH] \times [NO_X] = 1.17 \times 10^8 \text{ cm}^{-3} \text{ s}^{-1}$  which is equivalent to a production of  $\sim 9 \text{ ppb } HNO_3$  or  $\sim 24 \mu\text{g m}^{-3}$  within the residence time of the air in the chamber.

## **S5: Pattern of HOM-organic nitrates and determination of the median for their mass**

Most of the literature data give the fractions of organic nitrates in SOA and not the fraction of organic bound nitrate ( $OrgNO_3$ ). For better comparison of our data to literature data, we derived a factor to allow for conversion of the fraction of HOM-organic nitrates from the fraction of organic bound nitrate ( $OrgNO_3$ ) and vice versa. This conversion factor is based on the mass of  $OrgNO_3$  on the one hand and on the median mass of HOM-ON on the other hand. We take only HOM-ON with more than 6 O-atoms into account for determining their median mass since those HOM-ON would participate in particle mass formation. The conversion factor is determined for high  $NO_X$  levels when the pattern of organic nitrates is quite constant.



Figure S7 shows an extract of a mass spectrum from  $\alpha$ -pinene photo-oxidation in presence of  $\text{NO}_x$ .

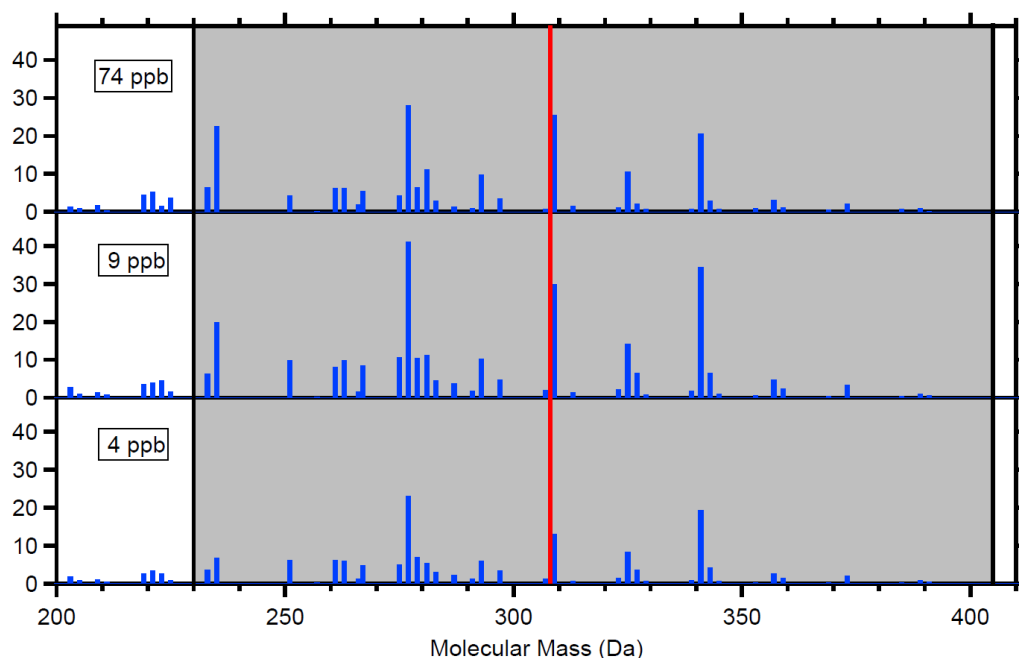

**Figure S7:** HOM-ON signal from  $\alpha$ -pinene in the mass range between 200 Da and 405 Da. The stick height represents the integral of the fitted peak at high resolution.  $[\alpha\text{-pinene}]_{\text{ss}} = 1.3$  ppb,  $[\text{NO}_x]_{\text{ss}} = 3.8\text{-}74$  ppb. Dominant peaks are HOM-ON with the molecular formulas  $\text{C}_{10}\text{H}_{15}\text{O}_x\text{ONO}_2$  ( $X = 5, 7, \text{ and } 9$ , masses 277, 309, and 341 Da).

In a first step the concentrations of HOM-ON were multiplied by their respective molecular mass to yield the mass concentrations. The mass concentrations were then normalized to total mass in the mass range from 230 to 405 Da.

$$c(\text{HOM-ON})_i^{\text{rel}} \cdot m(\text{HOM-ON})_i = \frac{c(\text{HOM-ON})_i \cdot m(\text{HOM-ON})_i}{\sum_i c(\text{HOM-ON})_i \cdot m(\text{HOM-ON})_i} \quad (\text{S16})$$

The median was determined in the usual way, however, summing up to  $m = 307$  Da led to  $\sim 39\%$ ; summing up to  $m = 309$  Da led to  $53\%$ . Reason for the large difference was the high abundance of the HOM-ON with the mass 309 Da ( $\text{C}_{10}\text{H}_{15}\text{O}_7\text{ONO}_2$ ) (see Fig. S7). As the best value for a median mass of HOM-organic nitrates we choose 309 Da. This molecular mass still includes the mass of the nitrate (62 Da), therefore  $\text{OrgNO}_3$  constitutes about  $1/5$  of the molecular mass of the median HOM-organic nitrate. To convert from mass fractions of  $\text{OrgNO}_3$  (as measured by AMS) to mass fractions of HOM-ON we therefore multiply by 5, vice versa we divide by 5 (Section 4.1 of the main manuscript).

## **S6: Peak lists for $\alpha$ -pinene and $\beta$ -pinene**

Table S1 gives a peak list with assignments of molecular formulas to the integer masses of the respective HOM. The appearance of HOM monomers with less than 10 C-atoms indicates that these HOM went through a fragmentation process. We attribute their formation to alkoxy radical decomposition whereby the alkoxy radicals itself are produced in reaction R4 and R5. As decomposition of HOM alkoxy radicals also forms HOM-peroxy radicals with less than 10 C-atoms, also dimers with less than 20 C-atoms were found.

**Table S1.** 50 major peaks from peak list of  $\alpha$ -pinene and  $\beta$ -pinene with and without NO<sub>x</sub> addition \*: no peak with clear identification and error below 15 ppm.

| $\alpha$ -Pinene + OH                           |                                                 |                                                 |    |         |                    | $\alpha$ -Pinene + OH + NO <sub>x</sub>          |                                                  |                                                 |    |    |         |         |                    |         |
|-------------------------------------------------|-------------------------------------------------|-------------------------------------------------|----|---------|--------------------|--------------------------------------------------|--------------------------------------------------|-------------------------------------------------|----|----|---------|---------|--------------------|---------|
|                                                 | Formula                                         | C                                               | H  | O       | Detected mass(m/z) | HOM(Da)                                          |                                                  | Formula                                         | C  | H  | O       | N       | Detected mass(m/z) | HOM(Da) |
| <b>C<sub>8</sub></b>                            | C <sub>8</sub> H <sub>10</sub> O <sub>8</sub>   | 8                                               | 10 | 8       | 297.022            | 234.037                                          | <b>C<sub>7</sub></b>                             | C <sub>7</sub> H <sub>7</sub> NO <sub>8</sub>   | 7  | 7  | 8       | 1       | 296.003            | 233.017 |
|                                                 | C <sub>8</sub> H <sub>10</sub> O <sub>9</sub>   | 8                                               | 10 | 9       | 313.018            | 250.032                                          |                                                  | C <sub>7</sub> H <sub>9</sub> NO <sub>8</sub>   | 7  | 9  | 8       | 1       | 298.018            | 235.033 |
|                                                 | C <sub>8</sub> H <sub>12</sub> O <sub>8</sub>   | 8                                               | 12 | 8       | 299.038            | 236.053                                          |                                                  | C <sub>7</sub> H <sub>9</sub> NO <sub>10</sub>  | 7  | 9  | 10      | 1       | 330.008            | 267.023 |
|                                                 | C <sub>8</sub> H <sub>12</sub> O <sub>9</sub>   | 8                                               | 12 | 9       | 315.034            | 252.048                                          | <b>C<sub>8</sub></b>                             | C <sub>8</sub> H <sub>10</sub> O <sub>8</sub>   | 8  | 10 | 8       | 0       | 297.023            | 234.038 |
| C <sub>8</sub> H <sub>14</sub> O <sub>8</sub>   | 8                                               | 14                                              | 8  | 301.054 | 238.068            | C <sub>8</sub> H <sub>10</sub> O <sub>9</sub>    |                                                  | 8                                               | 10 | 9  | 0       | 313.018 | 250.032            |         |
| <b>C<sub>9</sub></b>                            | C <sub>9</sub> H <sub>12</sub> O <sub>7</sub>   | 9                                               | 12 | 7       | 295.043            | 232.058                                          |                                                  | C <sub>8</sub> H <sub>10</sub> O <sub>12</sub>  | 8  | 10 | 12      | 0       | 361.003            | 298.017 |
|                                                 | C <sub>9</sub> H <sub>12</sub> O <sub>8</sub>   | 9                                               | 12 | 8       | 311.039            | 248.053                                          |                                                  | C <sub>8</sub> H <sub>11</sub> O <sub>12</sub>  | 8  | 11 | 12      | 0       | 362.010            | 299.025 |
|                                                 | C <sub>9</sub> H <sub>13</sub> O <sub>7</sub>   | 9                                               | 13 | 7       | 296.051            | 233.066                                          | C <sub>8</sub> H <sub>12</sub> O <sub>8</sub>    | 8                                               | 12 | 8  | 0       | 299.039 | 236.053            |         |
|                                                 | C <sub>9</sub> H <sub>13</sub> O <sub>8</sub>   | 9                                               | 13 | 8       | 312.046            | 249.060                                          | C <sub>8</sub> H <sub>13</sub> NO <sub>8</sub>   | 8                                               | 13 | 8  | 1       | 314.050 | 251.064            |         |
| C <sub>9</sub> H <sub>13</sub> O <sub>9</sub>   | 9                                               | 13                                              | 9  | 328.041 | 265.055            | <b>C<sub>9</sub></b>                             | C <sub>9</sub> H <sub>11</sub> O <sub>11</sub>   | 9                                               | 11 | 11 | 0       | 358.016 | 295.030            |         |
| C <sub>9</sub> H <sub>14</sub> O <sub>7</sub>   | 9                                               | 14                                              | 7  | 297.059 | 234.073            |                                                  | C <sub>9</sub> H <sub>12</sub> O <sub>8</sub>    | 9                                               | 12 | 8  | 0       | 311.039 | 248.053            |         |
| C <sub>9</sub> H <sub>14</sub> O <sub>8</sub>   | 9                                               | 14                                              | 8  | 313.054 | 250.068            |                                                  | C <sub>9</sub> H <sub>12</sub> O <sub>10</sub>   | 9                                               | 12 | 10 | 0       | 343.028 | 280.043            |         |
| C <sub>9</sub> H <sub>14</sub> O <sub>9</sub>   | 9                                               | 14                                              | 9  | 329.049 | 266.063            |                                                  | C <sub>9</sub> H <sub>13</sub> NO <sub>8</sub>   | 9                                               | 13 | 8  | 1       | 326.050 | 263.064            |         |
| C <sub>9</sub> H <sub>16</sub> O <sub>7</sub>   | 9                                               | 16                                              | 7  | 299.074 | 236.089            | C <sub>9</sub> H <sub>13</sub> NO <sub>9</sub>   | 9                                                | 13                                              | 9  | 1  | 342.044 | 279.059 |                    |         |
| C <sub>9</sub> H <sub>16</sub> O <sub>8</sub>   | 9                                               | 16                                              | 8  | 315.070 | 252.085            | C <sub>9</sub> H <sub>14</sub> O <sub>7</sub>    | 9                                                | 14                                              | 7  | 0  | 297.059 | 234.074 |                    |         |
| <b>C<sub>10</sub></b>                           | C <sub>10</sub> H <sub>14</sub> O <sub>6</sub>  | 10                                              | 14 | 6       | 293.064            | 230.078                                          | C <sub>9</sub> H <sub>14</sub> O <sub>8</sub>    | 9                                               | 14 | 8  | 0       | 313.054 | 250.069            |         |
|                                                 | C <sub>10</sub> H <sub>14</sub> O <sub>7</sub>  | 10                                              | 14 | 7       | 309.059            | 246.073                                          | C <sub>9</sub> H <sub>14</sub> O <sub>9</sub>    | 9                                               | 14 | 9  | 0       | 329.049 | 266.064            |         |
|                                                 | C <sub>10</sub> H <sub>14</sub> O <sub>8</sub>  | 10                                              | 14 | 8       | 325.054            | 262.069                                          | C <sub>9</sub> H <sub>15</sub> NO <sub>9</sub>   | 9                                               | 15 | 9  | 1       | 344.060 | 281.075            |         |
|                                                 | C <sub>10</sub> H <sub>14</sub> O <sub>9</sub>  | 10                                              | 14 | 9       | 341.049            | 278.063                                          | C <sub>9</sub> H <sub>15</sub> NO <sub>10</sub>  | 9                                               | 15 | 10 | 1       | 360.055 | 297.070            |         |
|                                                 | C <sub>10</sub> H <sub>14</sub> O <sub>10</sub> | 10                                              | 14 | 10      | 357.044            | 294.058                                          | <b>C<sub>10</sub></b>                            | C <sub>10</sub> H <sub>13</sub> NO <sub>8</sub> | 10 | 13 | 8       | 1       | 338.050            | 275.064 |
|                                                 | C <sub>10</sub> H <sub>15</sub> O <sub>7</sub>  | 10                                              | 15 | 7       | 310.067            | 247.081                                          |                                                  | C <sub>10</sub> H <sub>14</sub> O <sub>7</sub>  | 10 | 14 | 7       | 0       | 309.059            | 246.074 |
|                                                 | C <sub>10</sub> H <sub>15</sub> O <sub>9</sub>  | 10                                              | 15 | 9       | 342.056            | 279.071                                          |                                                  | C <sub>10</sub> H <sub>14</sub> O <sub>8</sub>  | 10 | 14 | 8       | 0       | 325.054            | 262.069 |
|                                                 | C <sub>10</sub> H <sub>15</sub> O <sub>10</sub> | 10                                              | 15 | 10      | 358.051            | 295.066                                          |                                                  | C <sub>10</sub> H <sub>14</sub> O <sub>9</sub>  | 10 | 14 | 9       | 0       | 341.049            | 278.064 |
|                                                 | C <sub>10</sub> H <sub>16</sub> O <sub>6</sub>  | 10                                              | 16 | 6       | 295.080            | 232.094                                          | C <sub>10</sub> H <sub>14</sub> O <sub>10</sub>  | 10                                              | 14 | 10 | 0       | 357.044 | 294.059            |         |
|                                                 | C <sub>10</sub> H <sub>16</sub> O <sub>7</sub>  | 10                                              | 16 | 7       | 311.074            | 248.089                                          | C <sub>10</sub> H <sub>14</sub> O <sub>11</sub>  | 10                                              | 14 | 11 | 0       | 373.039 | 310.054            |         |
|                                                 | C <sub>10</sub> H <sub>16</sub> O <sub>8</sub>  | 10                                              | 16 | 8       | 327.070            | 264.085                                          | C <sub>10</sub> H <sub>15</sub> NO <sub>7</sub>  | 10                                              | 15 | 7  | 1       | 324.070 | 261.085            |         |
|                                                 | C <sub>10</sub> H <sub>16</sub> O <sub>9</sub>  | 10                                              | 16 | 9       | 343.064            | 280.079                                          | C <sub>10</sub> H <sub>15</sub> NO <sub>8</sub>  | 10                                              | 15 | 8  | 1       | 340.065 | 277.080            |         |
|                                                 | C <sub>10</sub> H <sub>16</sub> O <sub>10</sub> | 10                                              | 16 | 10      | 359.059            | 296.074                                          | C <sub>10</sub> H <sub>15</sub> NO <sub>9</sub>  | 10                                              | 15 | 9  | 1       | 356.060 | 293.075            |         |
|                                                 | C <sub>10</sub> H <sub>16</sub> O <sub>11</sub> | 10                                              | 16 | 11      | 375.054            | 312.069                                          | C <sub>10</sub> H <sub>15</sub> NO <sub>10</sub> | 10                                              | 15 | 10 | 1       | 372.055 | 309.070            |         |
|                                                 | C <sub>10</sub> H <sub>17</sub> O <sub>10</sub> | 10                                              | 17 | 10      | 360.067            | 297.082                                          | C <sub>10</sub> H <sub>15</sub> NO <sub>11</sub> | 10                                              | 15 | 11 | 1       | 388.050 | 325.065            |         |
|                                                 | C <sub>10</sub> H <sub>18</sub> O <sub>6</sub>  | 10                                              | 18 | 6       | 297.095            | 234.110                                          | C <sub>10</sub> H <sub>15</sub> NO <sub>12</sub> | 10                                              | 15 | 12 | 1       | 404.045 | 341.059            |         |
|                                                 | C <sub>10</sub> H <sub>18</sub> O <sub>7</sub>  | 10                                              | 18 | 7       | 313.090            | 250.105                                          | C <sub>10</sub> H <sub>15</sub> NO <sub>13</sub> | 10                                              | 15 | 13 | 1       | 420.040 | 357.054            |         |
|                                                 | C <sub>10</sub> H <sub>18</sub> O <sub>8</sub>  | 10                                              | 18 | 8       | 329.085            | 266.100                                          | C <sub>10</sub> H <sub>15</sub> O <sub>7</sub>   | 10                                              | 15 | 7  | 0       | 310.067 | 247.082            |         |
| C <sub>10</sub> H <sub>18</sub> O <sub>10</sub> | 10                                              | 18                                              | 10 | 361.075 | 298.089            | C <sub>10</sub> H <sub>15</sub> O <sub>10</sub>  | 10                                               | 15                                              | 10 | 0  | 358.052 | 295.067 |                    |         |
| <b>C<sub>16</sub></b>                           | C <sub>16</sub> H <sub>24</sub> O <sub>12</sub> | 16                                              | 24 | 12      | 471.112            | 408.126                                          | C <sub>10</sub> H <sub>15</sub> O <sub>11</sub>  | 10                                              | 15 | 11 | 0       | 374.047 | 311.061            |         |
|                                                 | <b>C<sub>17</sub></b>                           | C <sub>17</sub> H <sub>24</sub> O <sub>12</sub> | 17 | 24      | 12                 | 483.112                                          | 420.126                                          | C <sub>10</sub> H <sub>16</sub> O <sub>7</sub>  | 10 | 16 | 7       | 0       | 311.075            | 248.090 |
| C <sub>17</sub> H <sub>26</sub> O <sub>10</sub> |                                                 | 17                                              | 26 | 10      | 453.137            | 390.152                                          | C <sub>10</sub> H <sub>16</sub> O <sub>8</sub>   | 10                                              | 16 | 8  | 0       | 327.070 | 264.085            |         |
| C <sub>17</sub> H <sub>26</sub> O <sub>11</sub> |                                                 | 17                                              | 26 | 11      | 469.132            | 406.147                                          | C <sub>10</sub> H <sub>16</sub> O <sub>9</sub>   | 10                                              | 16 | 9  | 0       | 343.065 | 280.079            |         |
| <b>C<sub>18</sub></b>                           | C <sub>18</sub> H <sub>28</sub> O <sub>12</sub> | 18                                              | 28 | 12      | 499.143            | 436.158                                          | C <sub>10</sub> H <sub>16</sub> O <sub>10</sub>  | 10                                              | 16 | 10 | 0       | 359.060 | 296.074            |         |
|                                                 | <b>C<sub>19</sub></b>                           | C <sub>19</sub> H <sub>28</sub> O <sub>11</sub> | 19 | 28      | 11                 | 495.148                                          | 432.163                                          | C <sub>10</sub> H <sub>16</sub> O <sub>11</sub> | 10 | 16 | 11      | 0       | 375.055            | 312.069 |
| C <sub>19</sub> H <sub>28</sub> O <sub>12</sub> |                                                 | 19                                              | 28 | 12      | 511.143            | 448.158                                          | C <sub>10</sub> H <sub>17</sub> O <sub>8</sub>   | 10                                              | 17 | 8  | 0       | 328.078 | 265.092            |         |
| C <sub>19</sub> H <sub>28</sub> O <sub>13</sub> |                                                 | 19                                              | 28 | 13      | 527.138            | 464.152                                          | C <sub>10</sub> H <sub>17</sub> NO <sub>7</sub>  | 10                                              | 17 | 7  | 1       | 326.086 | 263.101            |         |
| C <sub>19</sub> H <sub>30</sub> O <sub>12</sub> |                                                 | 19                                              | 30 | 12      | 513.159            | 450.173                                          | C <sub>10</sub> H <sub>17</sub> NO <sub>8</sub>  | 10                                              | 17 | 8  | 1       | 342.081 | 279.095            |         |
| C <sub>19</sub> H <sub>30</sub> O <sub>13</sub> | 19                                              | 30                                              | 13 | 529.154 | 466.168            | C <sub>10</sub> H <sub>17</sub> NO <sub>11</sub> | 10                                               | 17                                              | 11 | 1  | 390.066 | 327.080 |                    |         |
| <b>C<sub>20</sub></b>                           | C <sub>20</sub> H <sub>30</sub> O <sub>9</sub>  | 20                                              | 30 | 9       | 477.174            | 414.188                                          | C <sub>10</sub> H <sub>17</sub> NO <sub>12</sub> | 10                                              | 17 | 12 | 1       | 406.060 | 343.075            |         |
|                                                 | C <sub>20</sub> H <sub>30</sub> O <sub>11</sub> | 20                                              | 30 | 11      | 509.164            | 446.178                                          | <b>C<sub>11</sub></b>                            | C <sub>11</sub> H <sub>14</sub> O <sub>13</sub> | 11 | 14 | 13      | 0       | 417.029            | 354.043 |
|                                                 | C <sub>20</sub> H <sub>30</sub> O <sub>13</sub> | 20                                              | 30 | 13      | 541.154            | 478.168                                          |                                                  | C <sub>11</sub> H <sub>16</sub> O <sub>8</sub>  | 11 | 16 | 8       | 0       | 339.070            | 276.085 |
|                                                 | C <sub>20</sub> H <sub>32</sub> O <sub>9</sub>  | 20                                              | 32 | 9       | 479.189            | 416.204                                          |                                                  | C <sub>11</sub> H <sub>16</sub> O <sub>9</sub>  | 11 | 16 | 9       | 0       | 355.065            | 292.079 |
|                                                 | C <sub>20</sub> H <sub>32</sub> O <sub>11</sub> | 20                                              | 32 | 11      | 511.179            | 448.194                                          |                                                  | C <sub>11</sub> H <sub>16</sub> O <sub>10</sub> | 11 | 16 | 10      | 0       | 371.060            | 308.074 |
|                                                 | C <sub>20</sub> H <sub>32</sub> O <sub>12</sub> | 20                                              | 32 | 12      | 527.174            | 464.189                                          |                                                  | C <sub>11</sub> H <sub>16</sub> O <sub>13</sub> | 11 | 16 | 13      | 0       | 419.044            | 356.059 |

\* These compounds have less certainty.

| β-Pinene + OH                                    |                                                 |                                                |    |    |                    |         | β-Pinene + OH + NOx                              |                                                 |                                                   |                                                 |    |                    |         |         |         |
|--------------------------------------------------|-------------------------------------------------|------------------------------------------------|----|----|--------------------|---------|--------------------------------------------------|-------------------------------------------------|---------------------------------------------------|-------------------------------------------------|----|--------------------|---------|---------|---------|
| Formula                                          | C                                               | H                                              | O  | N  | Detected mass(m/z) | HOM(Da) | Formula                                          | C                                               | H                                                 | O                                               | N  | Detected mass(m/z) | HOM(Da) |         |         |
| <b>C<sub>7</sub></b>                             | C <sub>7</sub> H <sub>9</sub> O <sub>11</sub>   | 7                                              | 9  | 11 | 0                  | 331.003 | 269.014                                          | <b>C<sub>6</sub></b>                            | C <sub>6</sub> H <sub>7</sub> NO <sub>10</sub>    | 6                                               | 7  | 10                 | 1       | 314.995 | 253.007 |
|                                                  | C <sub>7</sub> H <sub>10</sub> O <sub>9</sub>   | 7                                              | 10 | 9  | 0                  | 300.021 | 238.032                                          |                                                 | C <sub>6</sub> H <sub>7</sub> NO <sub>11</sub>    | 6                                               | 7  | 11                 | 1       | 330.990 | 269.002 |
|                                                  | C <sub>7</sub> H <sub>11</sub> O <sub>9</sub>   | 7                                              | 11 | 9  | 0                  | 301.029 | 239.040                                          | <b>C<sub>7</sub></b>                            | C <sub>7</sub> H <sub>9</sub> NO <sub>8</sub>     | 7                                               | 9  | 8                  | 1       | 297.021 | 235.033 |
| <b>C<sub>8</sub></b>                             | C <sub>8</sub> H <sub>10</sub> O <sub>8</sub>   | 8                                              | 10 | 8  | 0                  | 296.026 | 234.038                                          |                                                 | C <sub>7</sub> H <sub>9</sub> NO <sub>10</sub>    | 7                                               | 9  | 10                 | 1       | 329.011 | 267.023 |
|                                                  | C <sub>8</sub> H <sub>11</sub> O <sub>8</sub>   | 8                                              | 11 | 8  | 0                  | 297.034 | 235.045                                          |                                                 | C <sub>7</sub> H <sub>10</sub> NO <sub>12</sub> * | 7                                               | 10 | 12                 | 1       | 362.009 | 300.020 |
|                                                  | C <sub>8</sub> H <sub>11</sub> O <sub>9</sub>   | 8                                              | 11 | 9  | 0                  | 313.029 | 251.040                                          | C <sub>7</sub> H <sub>11</sub> NO <sub>8</sub>  | 7                                                 | 11                                              | 8  | 1                  | 299.037 | 237.048 |         |
|                                                  | C <sub>8</sub> H <sub>12</sub> O <sub>9</sub>   | 8                                              | 12 | 9  | 0                  | 314.037 | 252.048                                          | C <sub>7</sub> H <sub>11</sub> NO <sub>9</sub>  | 7                                                 | 11                                              | 9  | 1                  | 315.032 | 253.043 |         |
|                                                  | C <sub>8</sub> H <sub>12</sub> O <sub>10</sub>  | 8                                              | 12 | 10 | 0                  | 330.031 | 268.043                                          | C <sub>7</sub> H <sub>11</sub> NO <sub>10</sub> | 7                                                 | 11                                              | 10 | 1                  | 331.027 | 269.038 |         |
|                                                  | C <sub>8</sub> H <sub>13</sub> O <sub>9</sub>   | 8                                              | 13 | 9  | 0                  | 315.044 | 253.056                                          | <b>C<sub>8</sub></b>                            | C <sub>8</sub> H <sub>10</sub> O <sub>8</sub>     | 8                                               | 10 | 8                  | 0       | 296.026 | 234.038 |
| <b>C<sub>9</sub></b>                             | C <sub>9</sub> H <sub>11</sub> O <sub>11</sub>  | 9                                              | 11 | 11 | 0                  | 357.018 | 295.030                                          |                                                 | C <sub>8</sub> H <sub>10</sub> O <sub>11</sub>    | 8                                               | 10 | 11                 | 0       | 344.011 | 282.022 |
|                                                  | C <sub>9</sub> H <sub>12</sub> O <sub>7</sub>   | 9                                              | 12 | 7  | 0                  | 294.047 | 232.058                                          | C <sub>8</sub> H <sub>12</sub> O <sub>9</sub>   | 8                                                 | 12                                              | 9  | 0                  | 314.037 | 252.048 |         |
|                                                  | C <sub>9</sub> H <sub>12</sub> O <sub>8</sub>   | 9                                              | 12 | 8  | 0                  | 310.042 | 248.053                                          | C <sub>8</sub> H <sub>12</sub> O <sub>10</sub>  | 8                                                 | 12                                              | 10 | 0                  | 330.031 | 268.043 |         |
|                                                  | C <sub>9</sub> H <sub>12</sub> O <sub>9</sub>   | 9                                              | 12 | 9  | 0                  | 326.037 | 264.048                                          | <b>C<sub>9</sub></b>                            | C <sub>9</sub> H <sub>12</sub> O <sub>9</sub>     | 9                                               | 12 | 9                  | 0       | 326.037 | 264.048 |
|                                                  | C <sub>9</sub> H <sub>12</sub> O <sub>10</sub>  | 9                                              | 12 | 10 | 0                  | 342.031 | 280.043                                          |                                                 | C <sub>9</sub> H <sub>12</sub> O <sub>10</sub>    | 9                                               | 12 | 10                 | 0       | 342.031 | 280.043 |
|                                                  | C <sub>9</sub> H <sub>12</sub> O <sub>11</sub>  | 9                                              | 12 | 11 | 0                  | 358.026 | 296.038                                          | C <sub>9</sub> H <sub>13</sub> NO <sub>9</sub>  | 9                                                 | 13                                              | 9  | 1                  | 341.047 | 279.059 |         |
|                                                  | C <sub>9</sub> H <sub>13</sub> O <sub>8</sub>   | 9                                              | 13 | 8  | 0                  | 311.049 | 249.061                                          | C <sub>9</sub> H <sub>13</sub> NO <sub>10</sub> | 9                                                 | 13                                              | 10 | 1                  | 357.042 | 295.054 |         |
|                                                  | C <sub>9</sub> H <sub>13</sub> O <sub>9</sub>   | 9                                              | 13 | 9  | 0                  | 327.044 | 265.056                                          | C <sub>9</sub> H <sub>13</sub> NO <sub>11</sub> | 9                                                 | 13                                              | 11 | 1                  | 373.037 | 311.049 |         |
|                                                  | C <sub>9</sub> H <sub>14</sub> O <sub>7</sub>   | 9                                              | 14 | 7  | 0                  | 296.062 | 234.074                                          | C <sub>9</sub> H <sub>13</sub> NO <sub>12</sub> | 9                                                 | 13                                              | 12 | 1                  | 389.032 | 327.044 |         |
|                                                  | C <sub>9</sub> H <sub>14</sub> O <sub>8</sub>   | 9                                              | 14 | 8  | 0                  | 312.057 | 250.069                                          | C <sub>9</sub> H <sub>14</sub> O <sub>9</sub>   | 9                                                 | 14                                              | 9  | 0                  | 328.052 | 266.064 |         |
|                                                  | C <sub>9</sub> H <sub>14</sub> O <sub>9</sub>   | 9                                              | 14 | 9  | 0                  | 328.052 | 266.064                                          | C <sub>9</sub> H <sub>14</sub> O <sub>10</sub>  | 9                                                 | 14                                              | 10 | 0                  | 344.047 | 282.059 |         |
|                                                  | C <sub>9</sub> H <sub>14</sub> O <sub>10</sub>  | 9                                              | 14 | 10 | 0                  | 344.047 | 282.059                                          | C <sub>9</sub> H <sub>15</sub> NO <sub>9</sub>  | 9                                                 | 15                                              | 9  | 1                  | 343.063 | 281.075 |         |
|                                                  | C <sub>9</sub> H <sub>15</sub> O <sub>7</sub>   | 9                                              | 15 | 7  | 0                  | 297.070 | 235.082                                          | C <sub>9</sub> H <sub>15</sub> NO <sub>10</sub> | 9                                                 | 15                                              | 10 | 1                  | 359.058 | 297.070 |         |
|                                                  | C <sub>9</sub> H <sub>15</sub> O <sub>12</sub>  | 9                                              | 15 | 12 | 0                  | 377.045 | 315.056                                          | C <sub>9</sub> H <sub>15</sub> NO <sub>11</sub> | 9                                                 | 15                                              | 11 | 1                  | 375.053 | 313.065 |         |
| C <sub>9</sub> H <sub>16</sub> O <sub>8</sub>    | 9                                               | 16                                             | 8  | 0  | 314.073            | 252.085 | <b>C<sub>10</sub></b>                            | C <sub>10</sub> H <sub>14</sub> O <sub>8</sub>  | 10                                                | 14                                              | 8  | 0                  | 324.057 | 262.069 |         |
| C <sub>9</sub> H <sub>16</sub> O <sub>9</sub>    | 9                                               | 16                                             | 9  | 0  | 330.068            | 268.079 |                                                  | C <sub>10</sub> H <sub>14</sub> O <sub>9</sub>  | 10                                                | 14                                              | 9  | 0                  | 340.052 | 278.064 |         |
| <b>C<sub>10</sub></b>                            | C <sub>10</sub> H <sub>14</sub> O <sub>7</sub>  | 10                                             | 14 | 7  | 0                  | 308.062 |                                                  | 246.074                                         | C <sub>10</sub> H <sub>14</sub> O <sub>10</sub>   | 10                                              | 14 | 10                 | 0       | 356.047 | 294.059 |
|                                                  | C <sub>10</sub> H <sub>14</sub> O <sub>8</sub>  | 10                                             | 14 | 8  | 0                  | 324.057 |                                                  | 262.069                                         | C <sub>10</sub> H <sub>14</sub> O <sub>11</sub>   | 10                                              | 14 | 11                 | 0       | 372.042 | 310.054 |
|                                                  | C <sub>10</sub> H <sub>14</sub> O <sub>9</sub>  | 10                                             | 14 | 9  | 0                  | 340.052 |                                                  | 278.064                                         | C <sub>10</sub> H <sub>14</sub> O <sub>12</sub>   | 10                                              | 14 | 12                 | 0       | 388.037 | 326.049 |
|                                                  | C <sub>10</sub> H <sub>14</sub> O <sub>10</sub> | 10                                             | 14 | 10 | 0                  | 356.047 |                                                  | 294.059                                         | C <sub>10</sub> H <sub>14</sub> O <sub>13</sub>   | 10                                              | 14 | 13                 | 0       | 404.032 | 342.043 |
|                                                  | C <sub>10</sub> H <sub>14</sub> O <sub>11</sub> | 10                                             | 14 | 11 | 0                  | 372.042 |                                                  | 310.054                                         | C <sub>10</sub> H <sub>14</sub> O <sub>14</sub>   | 10                                              | 14 | 14                 | 0       | 420.027 | 358.038 |
|                                                  | C <sub>10</sub> H <sub>15</sub> O <sub>8</sub>  | 10                                             | 15 | 8  | 0                  | 325.065 |                                                  | 263.077                                         | C <sub>10</sub> H <sub>15</sub> NO <sub>9</sub>   | 10                                              | 15 | 9                  | 1       | 355.063 | 293.075 |
|                                                  | C <sub>10</sub> H <sub>15</sub> O <sub>9</sub>  | 10                                             | 15 | 9  | 0                  | 341.060 |                                                  | 279.072                                         | C <sub>10</sub> H <sub>15</sub> NO <sub>10</sub>  | 10                                              | 15 | 10                 | 1       | 371.058 | 309.070 |
|                                                  | C <sub>10</sub> H <sub>15</sub> O <sub>10</sub> | 10                                             | 15 | 10 | 0                  | 357.055 |                                                  | 295.067                                         | C <sub>10</sub> H <sub>15</sub> NO <sub>11</sub>  | 10                                              | 15 | 11                 | 1       | 387.053 | 325.065 |
|                                                  | C <sub>10</sub> H <sub>15</sub> O <sub>11</sub> | 10                                             | 15 | 11 | 0                  | 373.050 |                                                  | 311.061                                         | C <sub>10</sub> H <sub>15</sub> NO <sub>12</sub>  | 10                                              | 15 | 12                 | 1       | 403.048 | 341.059 |
|                                                  | C <sub>10</sub> H <sub>15</sub> O <sub>12</sub> | 10                                             | 15 | 12 | 0                  | 389.045 |                                                  | 327.056                                         | C <sub>10</sub> H <sub>15</sub> NO <sub>13</sub>  | 10                                              | 15 | 13                 | 1       | 419.043 | 357.054 |
| C <sub>10</sub> H <sub>15</sub> NO <sub>10</sub> | 10                                              | 15                                             | 10 | 1  | 371.058            | 309.070 |                                                  | C <sub>10</sub> H <sub>16</sub> O <sub>8</sub>  | 10                                                | 16                                              | 8  | 0                  | 326.073 | 264.085 |         |
| C <sub>10</sub> H <sub>15</sub> NO <sub>11</sub> | 10                                              | 15                                             | 11 | 1  | 387.053            | 325.065 |                                                  | C <sub>10</sub> H <sub>16</sub> O <sub>9</sub>  | 10                                                | 16                                              | 9  | 0                  | 342.068 | 280.079 |         |
| C <sub>10</sub> H <sub>16</sub> O <sub>7</sub>   | 10                                              | 16                                             | 7  | 0  | 310.078            | 248.090 | C <sub>10</sub> H <sub>16</sub> O <sub>10</sub>  | 10                                              | 16                                                | 10                                              | 0  | 358.063            | 296.074 |         |         |
| C <sub>10</sub> H <sub>16</sub> O <sub>8</sub>   | 10                                              | 16                                             | 8  | 0  | 326.073            | 264.085 | C <sub>10</sub> H <sub>16</sub> O <sub>11</sub>  | 10                                              | 16                                                | 11                                              | 0  | 374.058            | 312.069 |         |         |
| C <sub>10</sub> H <sub>16</sub> O <sub>9</sub>   | 10                                              | 16                                             | 9  | 0  | 342.068            | 280.079 | C <sub>10</sub> H <sub>17</sub> NO <sub>9</sub>  | 10                                              | 17                                                | 9                                               | 1  | 357.079            | 295.090 |         |         |
| C <sub>10</sub> H <sub>16</sub> O <sub>10</sub>  | 10                                              | 16                                             | 10 | 0  | 358.063            | 296.074 | C <sub>10</sub> H <sub>17</sub> NO <sub>10</sub> | 10                                              | 17                                                | 10                                              | 1  | 373.074            | 311.085 |         |         |
| C <sub>10</sub> H <sub>17</sub> O <sub>9</sub>   | 10                                              | 17                                             | 9  | 0  | 343.076            | 281.087 | <b>C<sub>11</sub></b>                            | C <sub>11</sub> H <sub>14</sub> O <sub>12</sub> | 11                                                | 14                                              | 12 | 0                  | 400.037 | 338.049 |         |
| <b>C<sub>17</sub></b>                            | C <sub>17</sub> H <sub>26</sub> O <sub>12</sub> | 17                                             | 26 | 12 | 0                  | 484.131 |                                                  | 422.142                                         | C <sub>11</sub> H <sub>15</sub> O <sub>16</sub>   | 11                                              | 15 | 16                 | 0       | 465.024 | 403.036 |
|                                                  | <b>C<sub>18</sub></b>                           | C <sub>18</sub> H <sub>26</sub> O <sub>9</sub> | 18 | 26 | 9                  | 0       |                                                  | 448.146                                         | 386.158                                           | C <sub>11</sub> H <sub>16</sub> O <sub>10</sub> | 11 | 16                 | 10      | 0       | 370.063 |
| C <sub>18</sub> H <sub>26</sub> O <sub>10</sub>  |                                                 | 18                                             | 26 | 10 | 0                  | 464.141 |                                                  | 402.153                                         | C <sub>11</sub> H <sub>16</sub> O <sub>11</sub>   | 11                                              | 16 | 11                 | 0       | 386.058 | 324.069 |
| C <sub>18</sub> H <sub>26</sub> O <sub>11</sub>  |                                                 | 18                                             | 26 | 11 | 0                  | 480.136 |                                                  | 418.147                                         | C <sub>11</sub> H <sub>16</sub> O <sub>12</sub> * | 11                                              | 16 | 12                 | 0       | 402.053 | 340.064 |
| C <sub>18</sub> H <sub>26</sub> O <sub>12</sub>  |                                                 | 18                                             | 26 | 12 | 0                  | 496.131 |                                                  | 434.142                                         | C <sub>11</sub> H <sub>16</sub> O <sub>13</sub>   | 11                                              | 16 | 13                 | 0       | 418.047 | 356.059 |
| <b>C<sub>19</sub></b>                            | C <sub>19</sub> H <sub>28</sub> O <sub>10</sub> | 19                                             | 28 | 10 | 0                  | 478.157 | 416.168                                          | C <sub>11</sub> H <sub>16</sub> O <sub>14</sub> | 11                                                | 16                                              | 14 | 0                  | 434.042 | 372.054 |         |
|                                                  | C <sub>19</sub> H <sub>28</sub> O <sub>11</sub> | 19                                             | 28 | 11 | 0                  | 494.152 | 432.163                                          | C <sub>11</sub> H <sub>18</sub> O <sub>13</sub> | 11                                                | 18                                              | 13 | 0                  | 420.063 | 358.075 |         |
|                                                  | C <sub>19</sub> H <sub>30</sub> O <sub>12</sub> | 19                                             | 30 | 12 | 0                  | 512.162 | 450.174                                          | <b>C<sub>12</sub></b>                           | C <sub>12</sub> H <sub>18</sub> O <sub>15</sub> * | 12                                              | 19 | 15                 | 0       | 465.061 | 403.072 |

\* These compounds have less certainty.

**References in supplement (if not referenced in the manuscript):**

Atkinson, R., Baulch, D. L., Cox, R. A., Crowley, J. N., Hampson, R. F., Hynes, R. G., Jenkin, M. E., Rossi, M. J., and Troe, J.: Evaluated kinetic and photochemical data for atmospheric chemistry: Volume I - gas phase reactions of O-x, HOx, NOx and SOx species, *Atmos. Chem. Phys.*, 4, 1461-1738, doi: 10.5194/acp-4-1461-2004, 2004.

Burrows, J. P., Wallington, T. J., and Wayne, R. P.: *J. Chem. Soc. Faraday Trans.* , 2, 79, 111-122, doi: 10.1039/f29837900111, 1983.

Donahue, N. M., Dubey, M. K., Mohrshladt, R., Demerjian, K., and Anderson, J. G.: *J. Geophys. Res.*, 102, 6159-6168, doi: 10.1029/96JD02329, 1997.

IUPAC Subcommittee on Gas Kinetic Data Evaluation, 2008.

Long, B., Bao, J. L., and Truhlar, D. G.: Reaction of SO<sub>2</sub> with OH in the atmosphere. *Phys Chem. Chem. Phys.*, 19, 8091-8100, doi: 10.1039/c7cp00497d, 2017.

MCM Version 3.2, <http://mcm.leeds.ac.uk/MCMv3.2/> .

Stark, H., Yatayelli, R. L. N., Thompson, S. L., Kimmel, J. R., Cubison, M. J., Chhabra, P. S., Canagaratna, M. R., Jayne, J. T., Worsnop, D. R., and Jimenez, J. L.: Methods to extract molecular and bulk chemical information from series of complex mass spectra with limited mass resolution, *Int. J. Mass Spectrom.*, 389, 26–38, doi:10.1016/j.ijms.2015.08.011, 2015.
